# Supplementary figures and images for: Cardiac Involvement in Patients With Multisystem Inflammatory Syndrome in Adults
Source: PubMed Central journal article supplement — J Am Heart Assoc. 2024 Feb 13;13(4):e032143. doi: 10.1161/JAHA.123.032143 (PMC11010102; doi:10.1161/jaha.123.032143), 2024-02-13

# **SUPPLEMENTAL MATERIAL**

**Figure S1. Flowchart of the literature research methodology.**

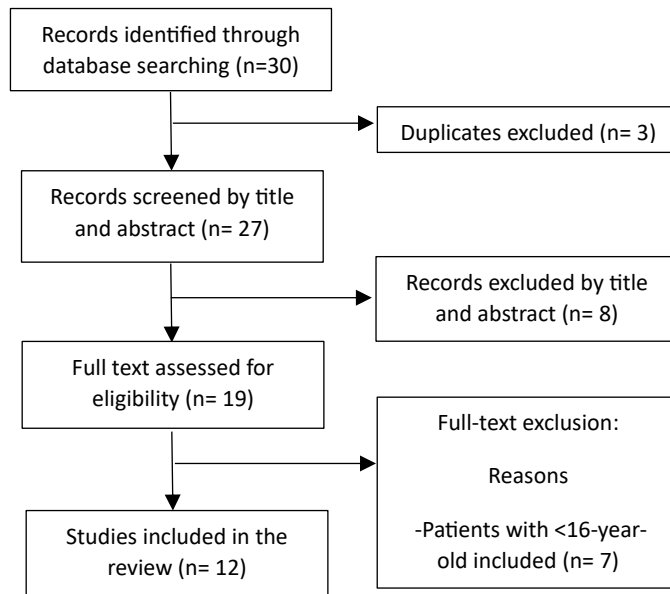

Supplement: JAH3-13-e032143-s001.pdf [file JAH3-13-e032143-s001.pdf]
